# Supplementary material for: A 2-D photonic crystal hydrogel for selective sensing of glucose
Source: Royal Society of Chemistry journal article supplement (doi:10.1039/c4ta01031k), 2014-01-01
Supplement: c4ta01031k1.pdf [file c4ta01031k1.pdf]

## Supplementary Information

### 2-D photonic crystal hydrogel for the selective sensing of glucose

Fei Xue, Zihui Meng\*, Fengyan Wang, Qihong Wang, Min Xue\*, Zhibin Xu

*School of Chemical Engineering and Environment, Beijing Institute of Technology, Beijing, China 100081*

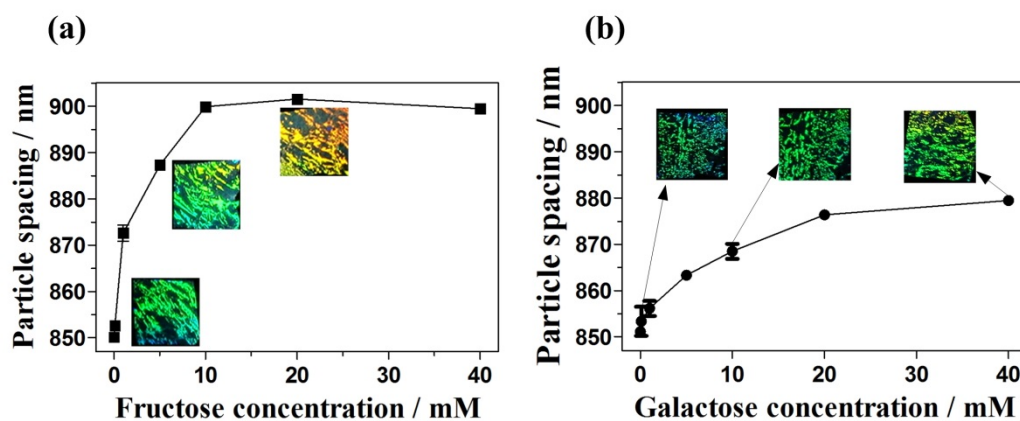

Figure 1. Dependence of the particle spacing of the 2-D PC hydrogels on fructose (a) and galactose (b) concentration in CHES buffer (ionic strength 150 mM, pH9). Inset showed the diffraction color of the 2-D PC hydrogels.
